# Supplementary material
Source: PubMed Central journal article supplement (PMC2714935)
Supplement: tpc.109.066399_1.pdf [file tpc.109.066399_1.pdf]

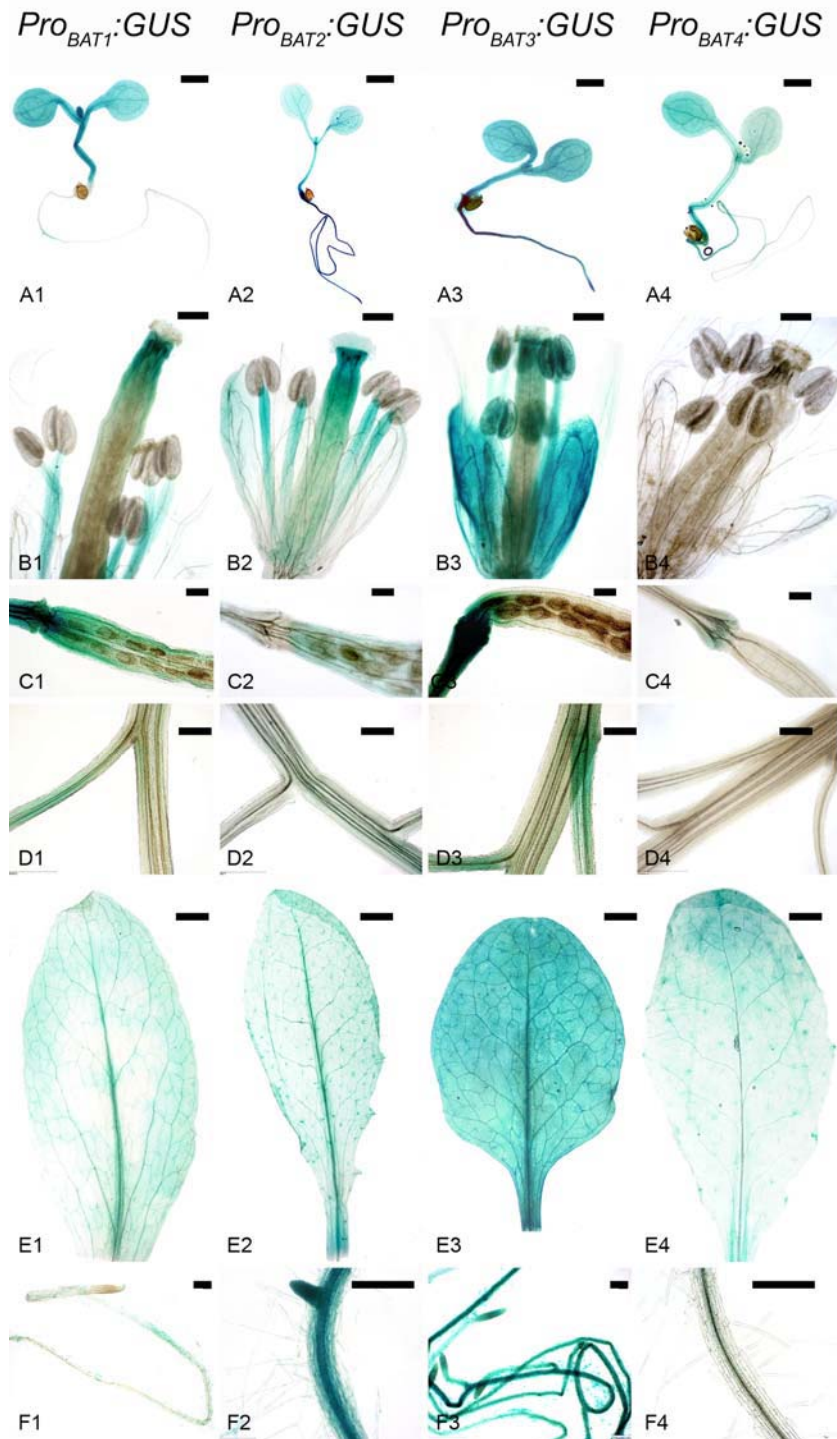

**Supplemental Figure 1.** Histochemical GUS staining in various tissues of *ProBAT1-4:GUS* plants. Seedlings (A), flowers (B), siliques (C), inflorescences (D), foliar parts (E), and roots (F) are shown. . Bar = 500  $\mu$ m in (A1-A4) and (D1-D4), 150  $\mu$ m in (B1-B4), (C1-C4), (F1-F4) and 1000  $\mu$ m in (E1-E4).

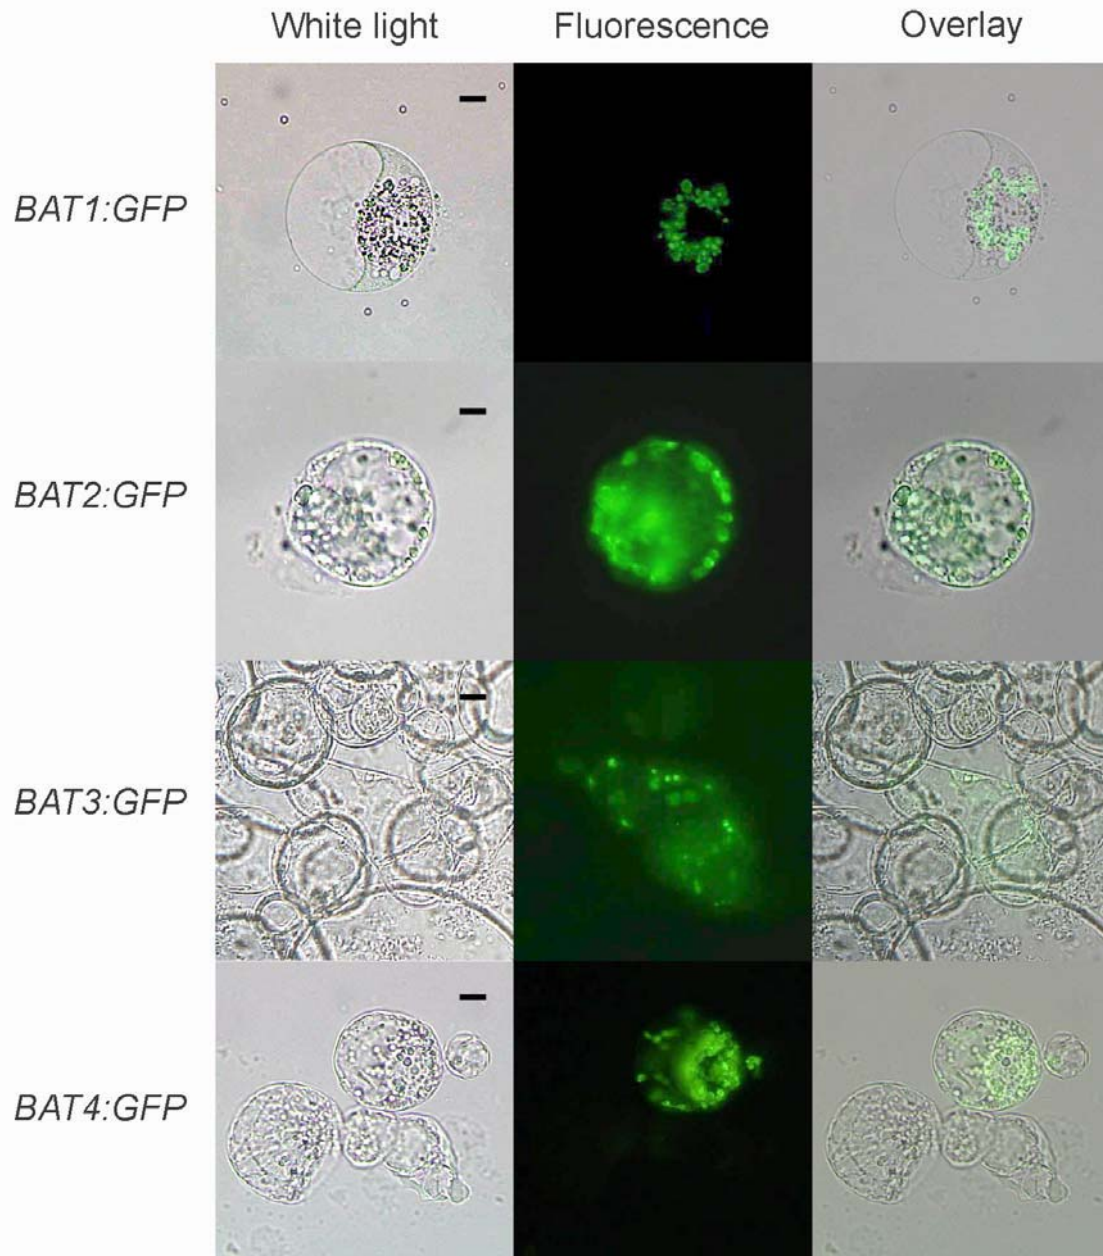

**Supplemental Figure 2.** Plastidic localization of the *BAT1*, *BAT2*, *BAT3* and *BAT4* full-length-GFP construct in BY tobacco protoplasts. Bar = 10  $\mu$ m.

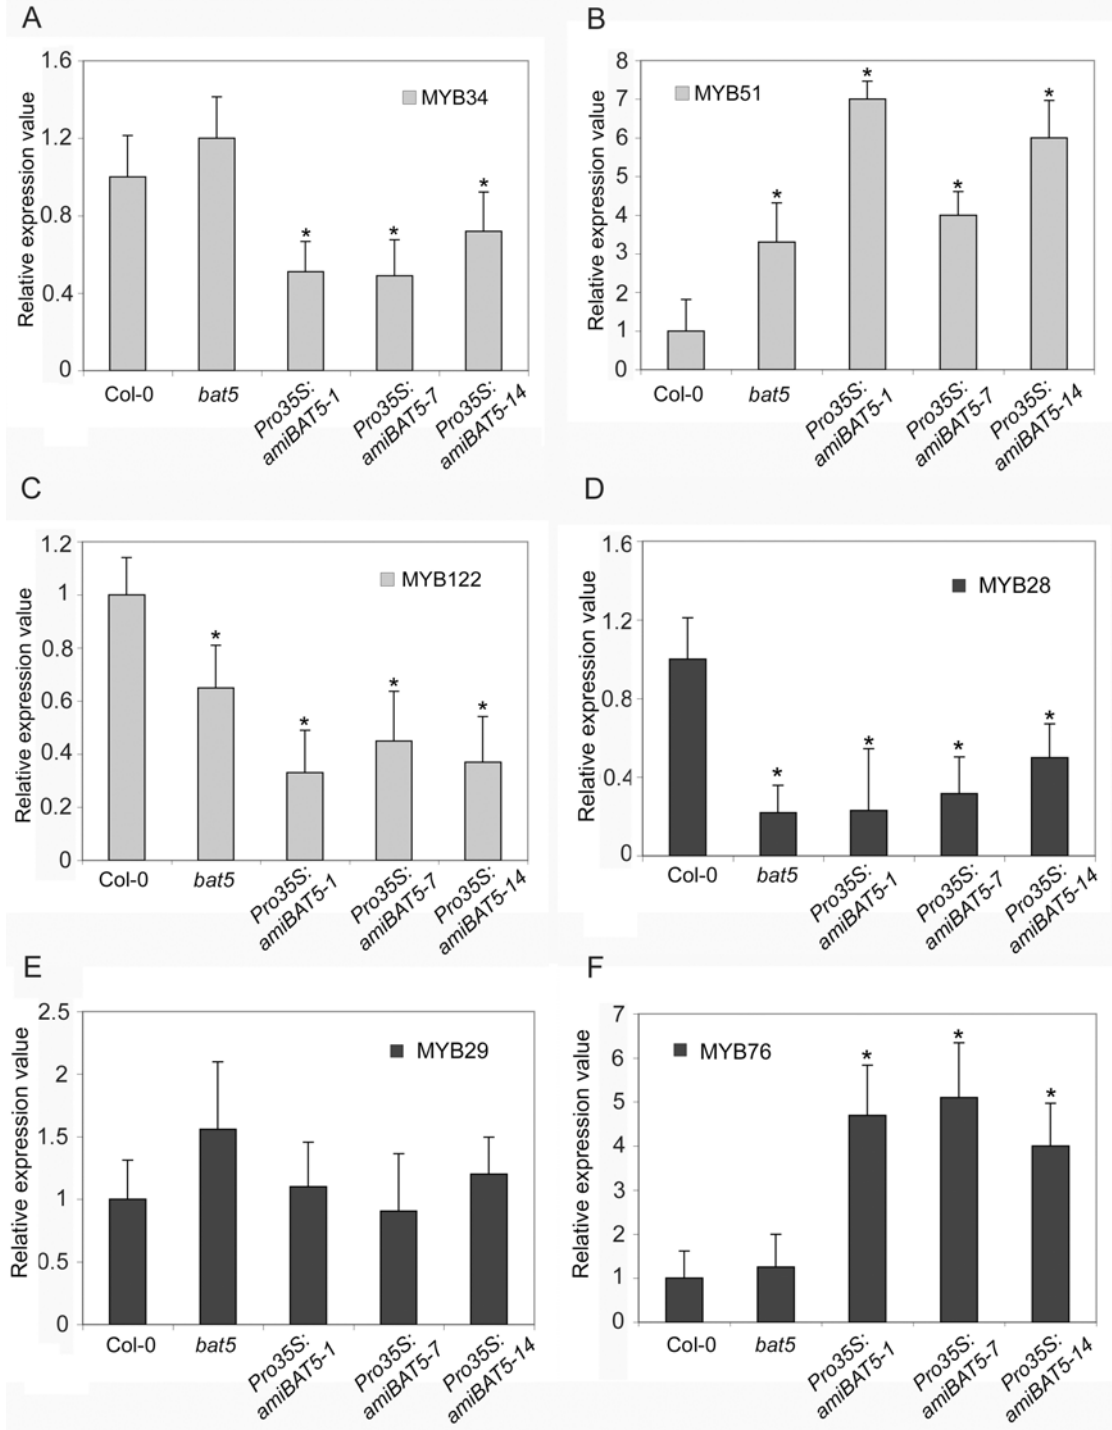

**Supplemental Figure 3.** Transcript levels of known glucosinolate biosynthesis regulators in leaves of *bat5* and *Pro35S:amiBAT5* plants in comparison with the wild type (Col-0), **(A-F)**, relative gene expression values are given compared to wild type (=1) for MYB34, MYB51, MYB122, MYB28, MYB29 and MYB76. Means  $\pm$  SD, (n=3). \*Significantly different in comparison to the wild type (Student's t-test,  $P < 0.05$ ).

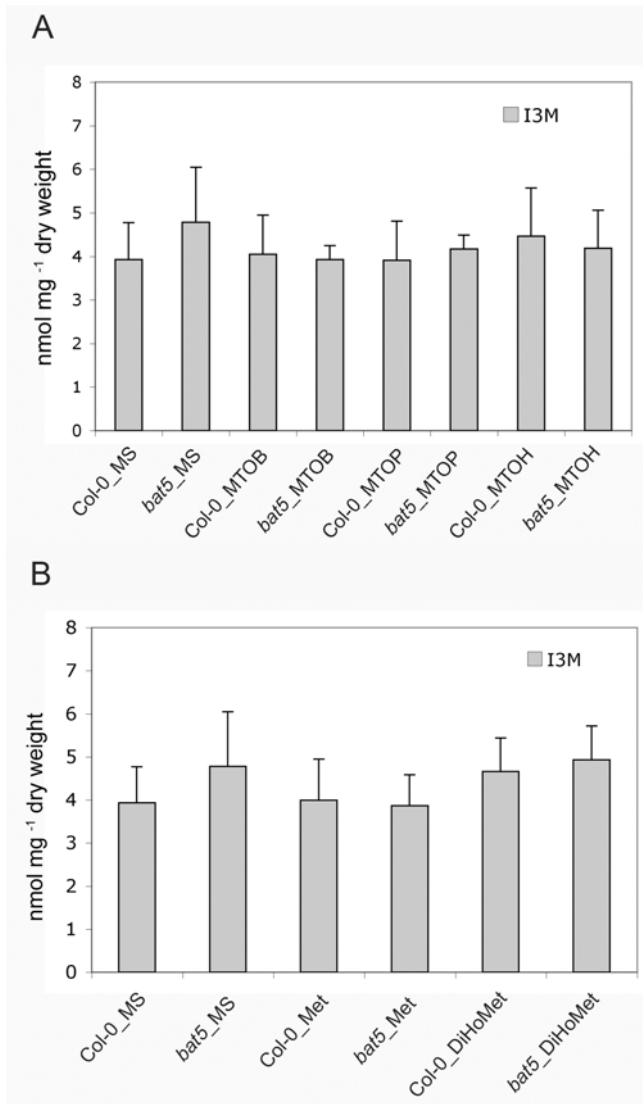

**Supplemental Figure 4.** Content of the indolic glucosinolate indol-3-ylmethyl-GS in *bat5* mutant fed with 2-keto acids (A) or amino acids (B).

Plants were germinated on ½ MS plates with agar and 2-week-old wild-type and *bat5* seedlings were transferred to media supplemented with 0.2 mM MTOB (4-methylthio-2-oxobutanoate), MTOP (6-methylthio-2-oxopentanoate), MTOH 6-methylthio-2-oxohexanoate, Met (methionine) or DiHoMeth (dihomomethionine), respectively, for 14 additional days, followed by analyses of aliphatic glucosinolates. Means ± SD, n=5.
